# Supplementary material for: Reaction intermediates recognized by in situ FTIR spectroscopy in CO 2 hydrogenation over the Cu/ZnO/SPP-zeolite catalyst
Source: Royal Society of Chemistry journal article supplement (doi:10.1039/d4lf00266k), 2024-09-21
Supplement: d4lf00266k1.pdf [file d4lf00266k1.pdf]

## Supplementary Information for

### Reaction intermediates recognized by *in-situ* FTIR spectroscopy in CO<sub>2</sub> hydrogenation over Cu/ZnO/SPP-zeolite catalyst

Xiaolong Liu,<sup>a,b,c</sup> Guangying Fu,<sup>\*b,c</sup> Qiaolin Lang,<sup>b,c</sup> Ruiqin Ding,<sup>b,c</sup> Qiangsheng Guo,<sup>d</sup> Ke Liang,<sup>e</sup> Shuman Gao,<sup>b,c</sup> Xiaobo Yang,<sup>b,c</sup> and Bing Yu<sup>\*a</sup>

- a. College of Chemistry and Chemical Engineering, Qingdao University, 266071 Qingdao, China. E-Mail: [yubing198@qdu.edu.cn](mailto:yubing198@qdu.edu.cn).
  - b. Key Laboratory of Photoelectric Conversion and Utilization of Solar Energy, Qingdao Institute of Bioenergy and Bioprocess Technology, Chinese Academy of Sciences, 266101 Qingdao, China. E-mail: [fugy@qibebt.ac.cn](mailto:fugy@qibebt.ac.cn).
  - c. Shandong Energy Institute, 266101 Qingdao, China.
  - d. School of Chemical and Environmental Engineering, Shanghai Institute of Technology, 201418 Shanghai, China
  - e. Tianjin Passion Advanced Material Technology LLC., TEDA, 300280 Tianjin, China.
- \* Corresponding authors.

#### S1: Synthesis and basic properties of the pure-silica SPP zeolite

SPP zeolite was synthesized according a procedure adapted from ref. <sup>1</sup>. A mixture of 24.9 g 25% aq. solution of tetra-n-butylammonium hydroxide and 16.67 g tetraethoxysilane was stirred in a sealed plastic bottle at room temperature for 24 hr., and at 115°C for another 48 hr. The solid product was recovered by high-speed centrifugation, washed with water, and freeze-dried. Calcination was performed at 550°C for 12 hours, with a heating ramp of 1°C/min.

XRD showed reflections in line with MFI framework, but broadened corresponding to the nanostructures (Figure S1a). SEM showed ellipsoidal particles of about 100 nm in length, consisting of intersecting nanoplates (Figure S1b). TEM showed that the thickness of the plates was about 2 nanometers (Figure S1c and S1d). There were voids between the intersecting nanoplates, providing space for encapsulation of guest particles. Figure S2 shows the N<sub>2</sub> adsorption/desorption isotherm at 79 K of the calcined

SPP zeolite and the associated analysis of the mesopore distributions. The t-plot evaluation showed a micropore volume of  $0.075 \text{ cm}^3/\text{g}$ , an external surface area of  $474.5 \text{ m}^2/\text{g}$ ; the BJH analysis indicated a mesopore distribution between 2–8 nm.

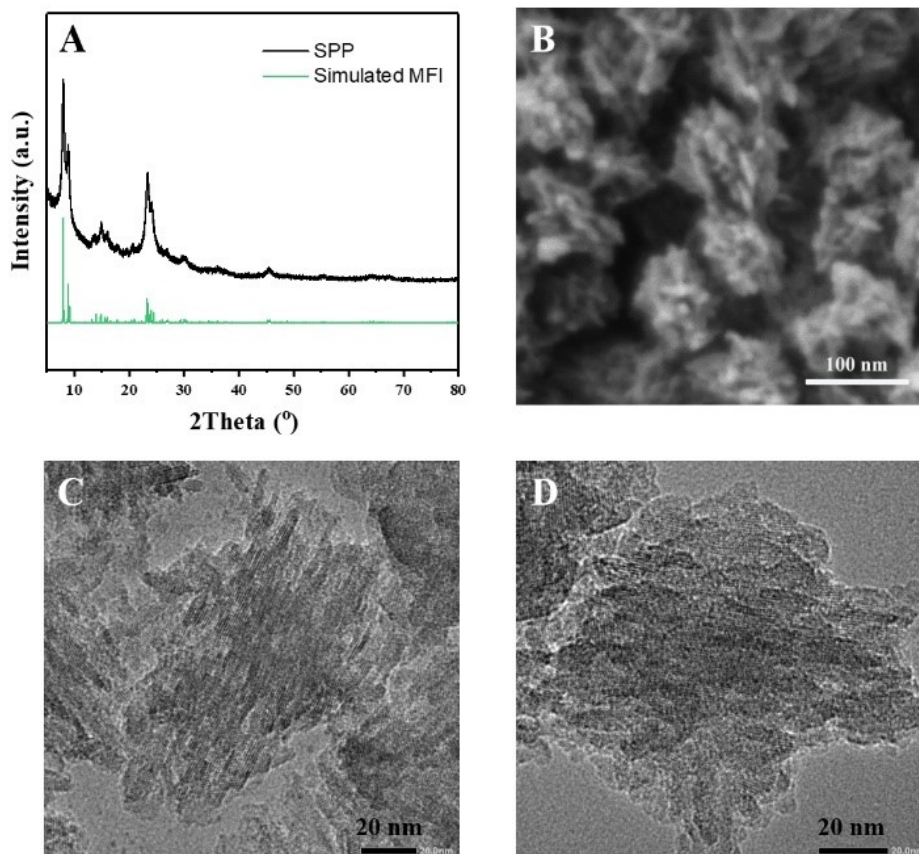

**Figure S1.** XRD pattern (A), SEM (B) and TEM (C and D) images of the SPP zeolite.

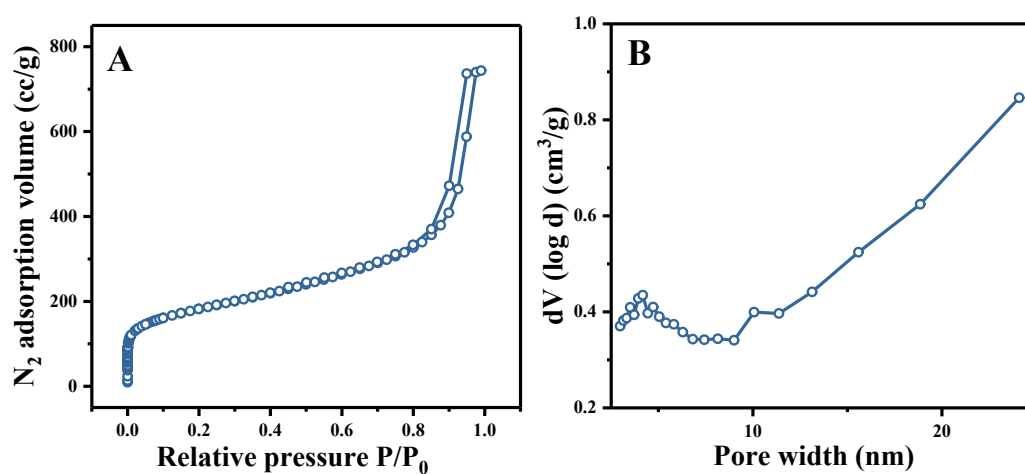

**Figure S2.** N<sub>2</sub> adsorption (A) and BJH pore-size distribution (B) of the SPP zeolite.

## S2: *quasi-in-situ* XPS and *in-situ* FTIR studies

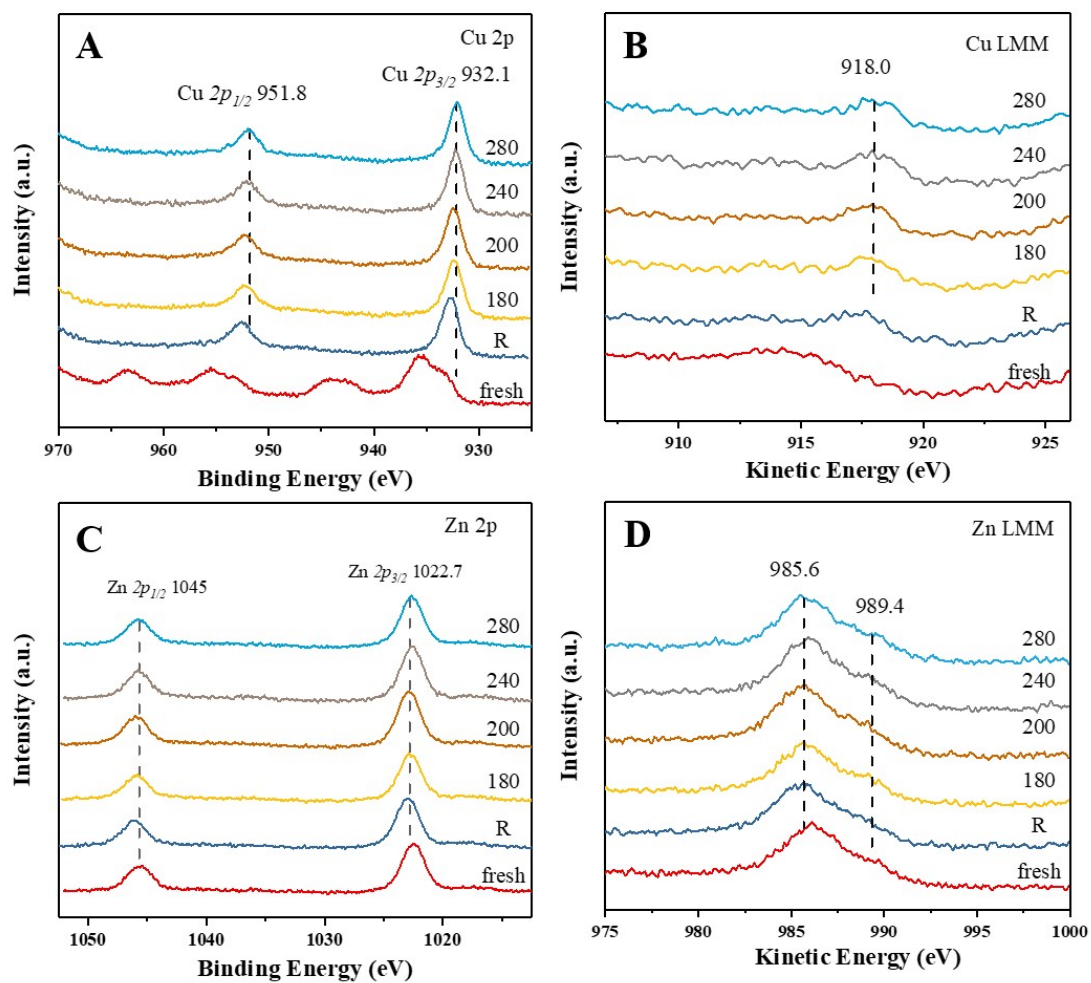

**Figure S3.** *quasi-in-situ* XPS spectra of CuZn-SPP : (A) Cu 2p, (B) Cu LMM, (C) Zn 2p, (D) Zn LMM.

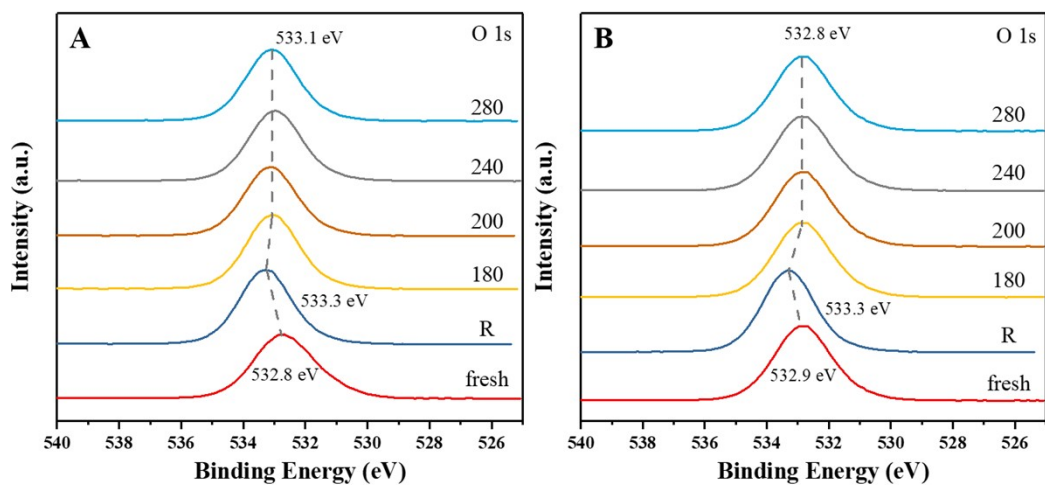

Figure S4. *Quasi-in-situ* O 1s XPS spectra of CuZn-SPP-E (A) and CuZn-SPP (B).

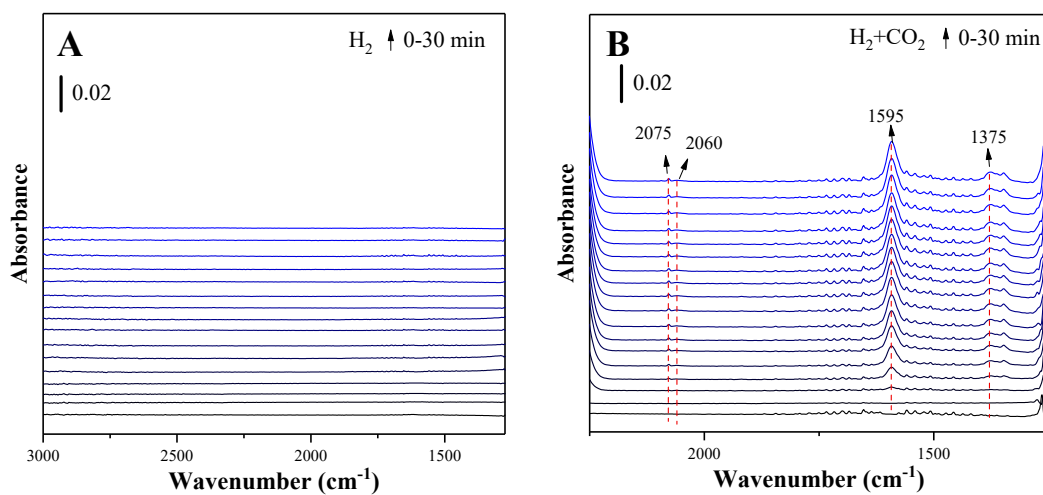

Figure S5. *in-situ* FTIR of CuZn-SPP-E in  $H_2$  and then  $CO_2/3H_2$  flow at  $150^\circ C$ .

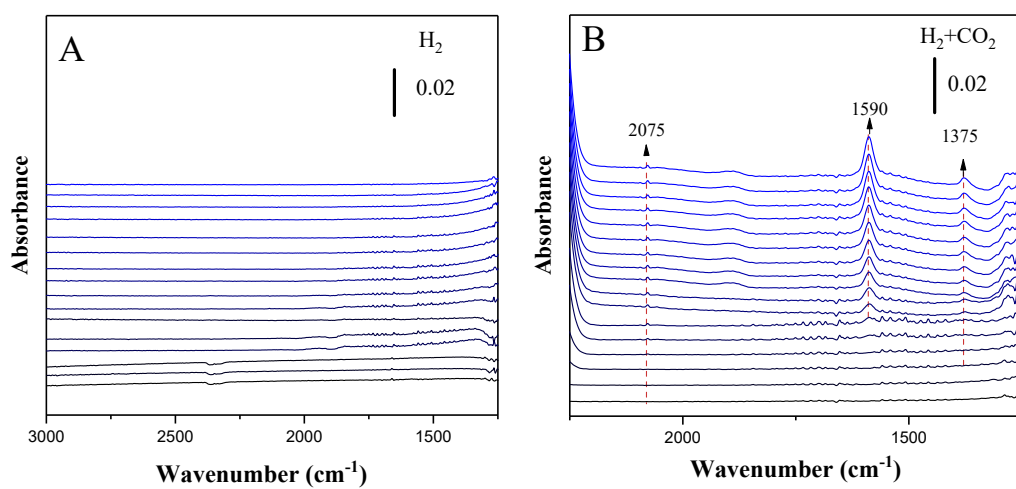

Figure S6. *in-situ* FTIR of CuZn-SPP  $H_2$  and then in  $CO_2/3H_2$  flow at  $150^\circ C$ .

## Reference

(1) Zhang, X.; Liu, D.; Xu, D.; Asahina, S.; Cychosz, K. A.; Agrawal, K. V.; Al Wahedi, Y.; Bhan, A.; Al Hashimi, S.; Terasaki, O.; et al. Synthesis of Self-Pillared Zeolite Nanosheets by Repetitive Branching. *Science* **2012**, *336* (6089), 1684-1687. DOI: 10.1126/science.1221111 (accessed 2023/11/06).
